# Supplementary material
Source: PubMed Central journal article supplement (PMC8008752)
Supplement: NEJMc2102153_appendix.pdf [file NEJMc2102153_appendix.pdf]

## Supplementary Appendix

This appendix has been provided by the authors to give readers additional information about their work.

Supplement to: Daniel W, Nivet M, Warner J, Podolsky DK. Early evidence of the effect of SARS-CoV-2 vaccine at one medical center. *N Engl J Med*. DOI: [10.1056/NEJMc2102153](https://doi.org/10.1056/NEJMc2102153)

## Table of Contents

|                                                                                      |   |
|--------------------------------------------------------------------------------------|---|
| Forecasting of COVID-19 Cases among UTSW Employees Sans Vaccine (Figure 1B)          | 1 |
| Count of Total Employees in Self Isolation/Quarantine                                | 2 |
| Vaccine Eligible UTSW Employees Stratified by COVID-19 Vaccination Status (N=23,234) | 3 |

## Forecasting of COVID-19 Cases among UTSW Employees Sans Vaccine (Figure 1B)

### ARIMA Model

The Automatic Regressive Integrated Moving Average (ARIMA) model<sup>1</sup> was used to forecast the number of positive COVID-19 cases among UTSW Employees without the vaccination. On 12/15/2020, UTSW started vaccinating employees. The forecasting is based on the number of positive cases from 10/01/2020 to 12/14/2020.

The ARIMA (p, d, q) consists of three components – AR (p) (Autoregression), I (d) (Integrated), and MA (q) (Moving Average):

AR (p) models the current value  $Y_t$  linearly depends on its lagged values  $Y_{t-1}, Y_{t-2}, \dots, Y_{t-p}$  and the current residuals  $\varepsilon_t$ , as shown in Eq. (1).

$$Y_t = \alpha + \beta_1 Y_{t-1} + \beta_2 Y_{t-2} + \dots + \beta_p Y_{t-p} + \varepsilon_t \quad (1)$$

MA (q) models the current value  $Y_t$  linearly depends on the lag residuals  $\varepsilon_{t-1}, \varepsilon_{t-2}, \dots, \varepsilon_{t-q}$ , which were generated from the autoregressive models of the respective lags, as shown in Eq. (2).

$$Y_t = \alpha + \theta_1 \varepsilon_{t-1} + \theta_2 \varepsilon_{t-2} + \dots + \theta_q \varepsilon_{t-q} + \varepsilon_t \quad (2)$$

I (d) transformed the non-stationary time series into stationary by taking the difference process d times. Thus, the ARIMA model is the combination of AR and MA after the time series was differenced and stationary in Eq. (3):

$$Y_t = \alpha + \beta_1 Y_{t-1} + \beta_2 Y_{t-2} + \dots + \beta_p Y_{t-p} + \varepsilon_t + \theta_1 \varepsilon_{t-1} + \theta_2 \varepsilon_{t-2} + \dots + \theta_q \varepsilon_{t-q} \quad (3)$$

Partial auto correlation (PACF) and auto correlation (ACF) were used to determine the parameters p and q. The Akaike Information Criteria (AIC) was further calculate to obtain a combination of parameters that have a better model performance, i.e., the lower the AIC, the better the performance. In this study, ARIMA (0, 1, 4) showed the best performance.

### Description of Figure 1B

The upward forecasting line in Figure 1B showed that COVID-19 infections would trend upward without vaccination. Yet, after vaccination began on December 15, 2020, the actual number of COVID-19 infections started to deviate from the projected trend, going downward.

### Reference

1. Ceylan Z (2020) Estimation of COVID-19 prevalence in Italy, Spain, and France. Science of The Total Environment, 729, 138817.

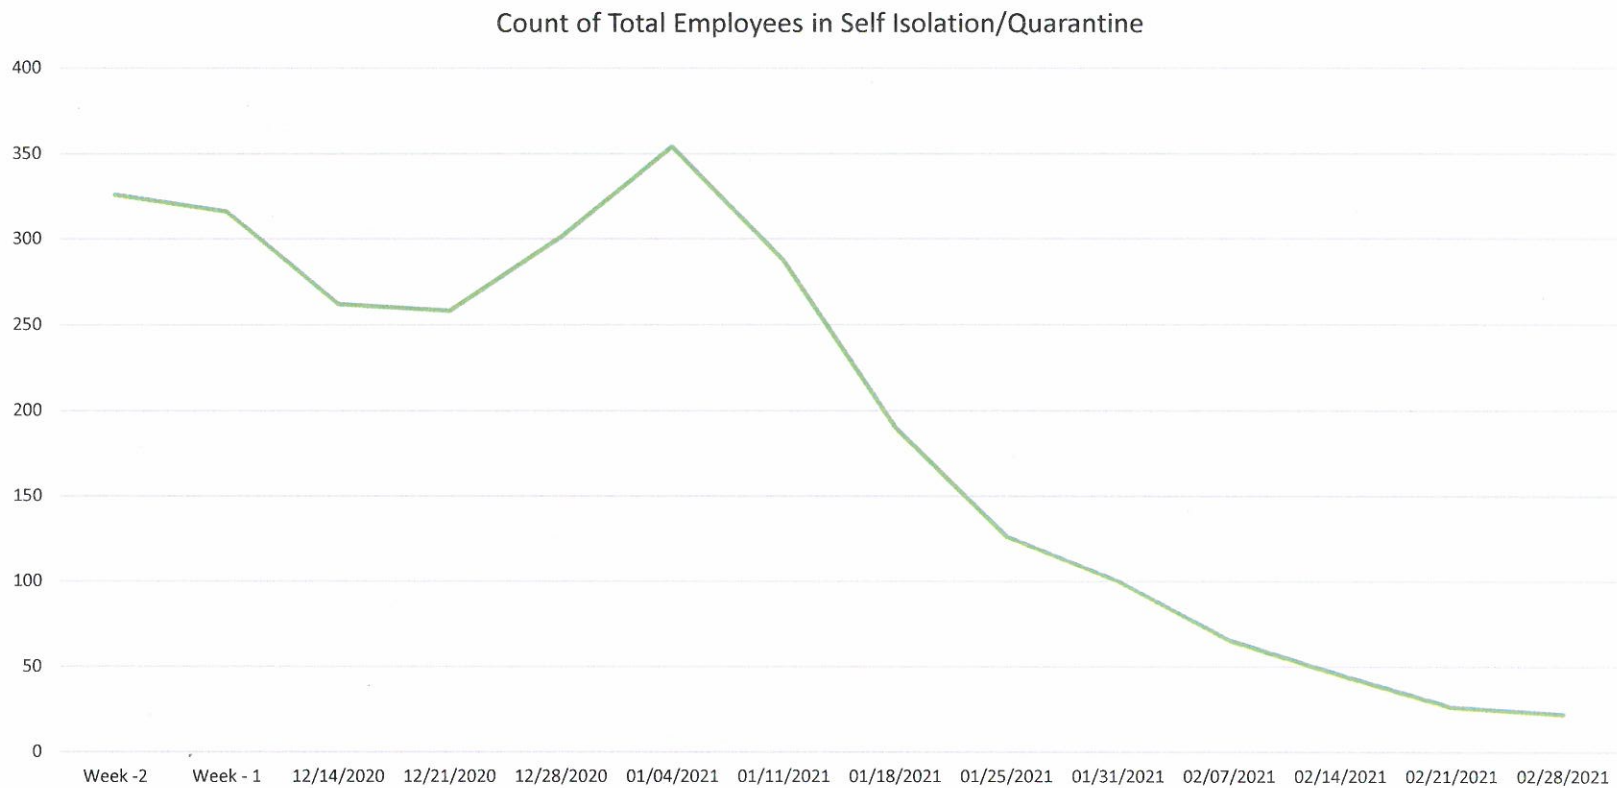

Weekly count of UTSW employees (N = 23,234) in self-isolation (SI) or self-quarantine (SQ), 11/30/2020 – 2/28/2021. SI refers to a 10-day isolation period starting from the employee’s first positive COVID-19 test. The SI time frame will be extended to 20 days if the employee is already immunocompromised from prior diagnosis. SQ refers to a 10-day home quarantine if the employee is exposed to a COVID-19 positive individual. People in SQ will switch to SI if they have a positive COVID-19 test.

**Supplemental Table 1: Vaccine Eligible UTSW Employees Stratified by COVID-19 Vaccination Status (N=23,234)**

| Demographic Factor                  |                                   | COVID-19 Vaccination Status |         |                |         |                      |         |
|-------------------------------------|-----------------------------------|-----------------------------|---------|----------------|---------|----------------------|---------|
|                                     |                                   | Fully Vaccinated            |         | Not Vaccinated |         | Partially Vaccinated |         |
|                                     |                                   | n (%)                       |         | n (%)          |         |                      |         |
| <b>Age Group (years)</b>            | <=24                              | 437                         | (5.4%)  | 609            | (6.8%)  | 736                  | (12.0%) |
|                                     | >24- 44                           | 4330                        | (53.3%) | 5314           | (59.2%) | 3244                 | (52.8%) |
|                                     | >44-64                            | 2990                        | (36.8%) | 2550           | (28.4%) | 1903                 | (31.0%) |
|                                     | >64                               | 334                         | (4.1%)  | 258            | (2.9%)  | 238                  | (3.9%)  |
|                                     | Unknown                           | 30                          | (0.4%)  | 238            | (2.7%)  | 23                   | (0.4%)  |
| <b>Gender</b>                       | Female                            | 5181                        | (63.8%) | 6282           | (70.0%) | 3891                 | (63.3%) |
|                                     | Male                              | 2924                        | (36.0%) | 2558           | (28.5%) | 2232                 | (36.3%) |
|                                     | Unknown                           | 16                          | (0.2%)  | 129            | (1.4%)  | 21                   | (0.3%)  |
| <b>Race</b>                         | American Indian or Alaska Native  | 42                          | (0.5%)  | 41             | (0.5%)  | 22                   | (0.4%)  |
|                                     | Asian                             | 1223                        | (15.1%) | 750            | (8.4%)  | 1066                 | (17.4%) |
|                                     | Black or African American         | 531                         | (6.5%)  | 1661           | (18.5%) | 616                  | (10.0%) |
|                                     | Native Hawaiian/ Pacific Islander | 14                          | (0.2%)  | 16             | (0.2%)  | 10                   | (0.2%)  |
|                                     | White                             | 3362                        | (41.4%) | 2516           | (28.1%) | 2269                 | (36.9%) |
|                                     | Multi-race                        | 23                          | (0.3%)  | 23             | (0.3%)  | 25                   | (0.4%)  |
|                                     | Some other race                   | 277                         | (3.4%)  | 202            | (2.3%)  | 220                  | (3.6%)  |
|                                     | Declined                          | 52                          | (0.6%)  | 38             | (0.4%)  | 33                   | (0.5%)  |
| Unknown Race                        | 2597                              | (32.0%)                     | 3722    | (41.5%)        | 1883    | (30.6%)              |         |
| <b>Ethnicity</b>                    | Hispanic or Latino                | 761                         | (9.4%)  | 855            | (9.5%)  | 692                  | (11.3%) |
|                                     | Non-Hispanic/Latino               | 4845                        | (59.7%) | 4556           | (50.8%) | 3608                 | (58.7%) |
|                                     | Unknown                           | 2515                        | (31.0%) | 3558           | (39.7%) | 1844                 | (30.0%) |
| <b>Area Deprivation Index (ADI)</b> | 1-3                               | 4645                        | (57.2%) | 2128           | (23.7%) | 2897                 | (47.2%) |
|                                     | 4-7                               | 1794                        | (22.1%) | 1401           | (15.6%) | 1914                 | (31.2%) |
|                                     | 8-10                              | 286                         | (3.5%)  | 401            | (4.5%)  | 257                  | (4.2%)  |
|                                     | Other                             | 123                         | (1.5%)  | 84             | (0.9%)  | 147                  | (2.4%)  |
|                                     | Unknown                           | 1273                        | (15.7%) | 4955           | (55.2%) | 929                  | (15.1%) |
| <b>Education</b>                    | HS or less                        | 409                         | (5.0%)  | 1137           | (12.7%) | 404                  | (6.6%)  |
|                                     | Associate                         | 1266                        | (15.6%) | 2126           | (23.7%) | 946                  | (15.4%) |
|                                     | Bachelor                          | 2254                        | (27.8%) | 1668           | (18.6%) | 1698                 | (27.6%) |
|                                     | Doctorate & Postdoc               | 2249                        | (27.7%) | 1750           | (19.5%) | 1071                 | (17.4%) |
|                                     | Master                            | 1337                        | (16.5%) | 1151           | (12.8%) | 1003                 | (16.3%) |
|                                     | Unknown/ Not Indicated            | 606                         | (7.5%)  | 1137           | (12.7%) | 1022                 | (16.6%) |
| <b>Language</b>                     | English                           | 6401                        | (78.8%) | 6022           | (67.1%) | 4828                 | (78.6%) |
|                                     | Non-English                       | 105                         | (1.3%)  | 102            | (1.1%)  | 109                  | (1.8%)  |
|                                     | Unknown/ Not Available            | 1615                        | (19.9%) | 2845           | (31.7%) | 1207                 | (19.6%) |
| <b>Employment Duration (years)</b>  | <=3                               | 3557                        | (43.8%) | 4985           | (55.6%) | 2651                 | (43.1%) |
|                                     | >3-6                              | 1653                        | (20.4%) | 1582           | (17.6%) | 1224                 | (19.9%) |
|                                     | >6-9                              | 892                         | (11.0%) | 779            | (8.7%)  | 619                  | (10.1%) |
|                                     | >9                                | 1901                        | (23.4%) | 1327           | (14.8%) | 1217                 | (19.8%) |
|                                     | Unknown                           | 118                         | (1.5%)  | 296            | (3.3%)  | 433                  | (7.0%)  |
| <b>Telework Status</b>              | Blended Schedule                  | 1267                        | (15.6%) | 883            | (9.8%)  | 1357                 | (22.1%) |
|                                     | Remote                            | 772                         | (9.5%)  | 1755           | (19.6%) | 1902                 | (31.0%) |
|                                     | On Campus                         | 5585                        | (68.8%) | 4739           | (52.8%) | 2053                 | (33.4%) |
|                                     | Unknown/ Unmapped                 | 497                         | (6.1%)  | 1592           | (17.8%) | 832                  | (13.5%) |
| <b>Total</b>                        |                                   | <b>8121</b>                 |         | <b>8969</b>    |         | <b>6144</b>          |         |
